# Supplementary material for: Poly(acrylonitrile-co-styrene sodium sulfonate-co-n-butyl acrylate) terpolymer based cation exchange membrane for water desalination via electrodialysis
Source: Royal Society of Chemistry journal article supplement (doi:10.1039/c5ra07191g), 2015-01-01
Supplement: c5ra07191g1.pdf [file c5ra07191g1.pdf]

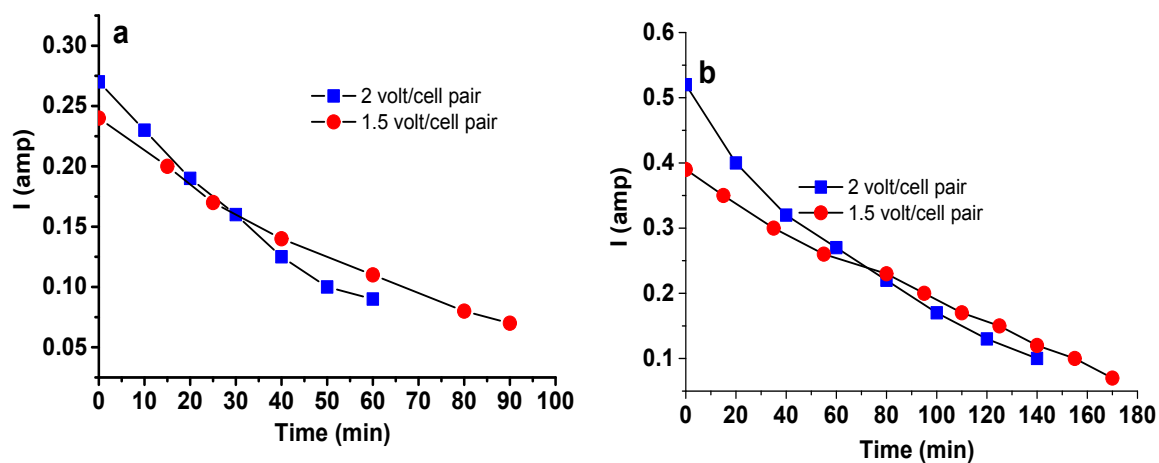

**Fig. S1.** Variation of  $I$  (amp) with time during diluted sea water desalination containing TDS (a) 2000 and (b) 5000 mg/L respectively with CEM-3 at 1.5-2 volt/cell pair applied potential.

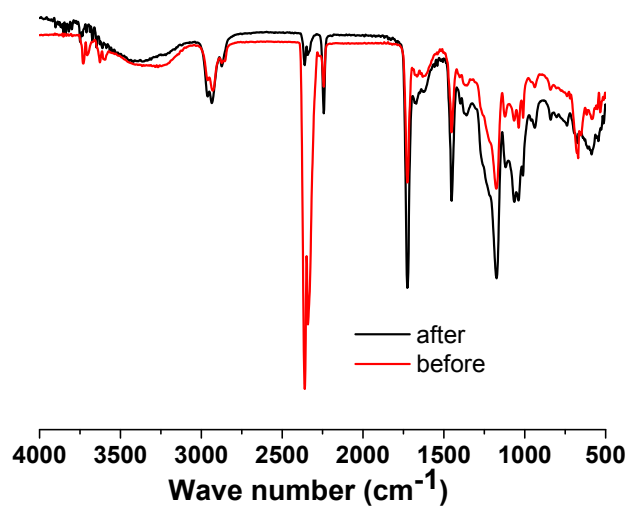

**Figure S2.** ATR-IR spectrum of CEM-3 before and after exposure with Fentons reagent at 70 °C for 9 h.

**Table S1.** Values of W, CE(%) and J during diluted sea water desalination containing TDS 2000 mg/L using CEM-3 at 2 volt/cell pair applied potential and at different pH

| pH | W<br>(KW.h/Kg) | CE<br>(%) | J<br>(Kg/m <sup>2</sup> s) |
|----|----------------|-----------|----------------------------|
| 5  | 1.25           | 73.2      | 0.000149                   |
| 8  | 1.06           | 86.0      | 0.000164                   |
| 10 | 1.16           | 79.2      | 0.000157                   |
| 12 | 1.24           | 74.2      | 0.000122                   |
